# Supplementary material for: Comparative Gut Microbiome Differences between Ferric Citrate and Calcium Carbonate Phosphate Binders in Patients with End-Stage Kidney Disease
Source: PubMed Central journal article supplement (PMC7767080; doi:10.3390/microorganisms8122040), 2020-12-20
Supplement: microorganisms-08-02040-s001.pdf [file microorganisms-08-02040-s001.pdf]

**Figure S1.** Enrollment of study participants

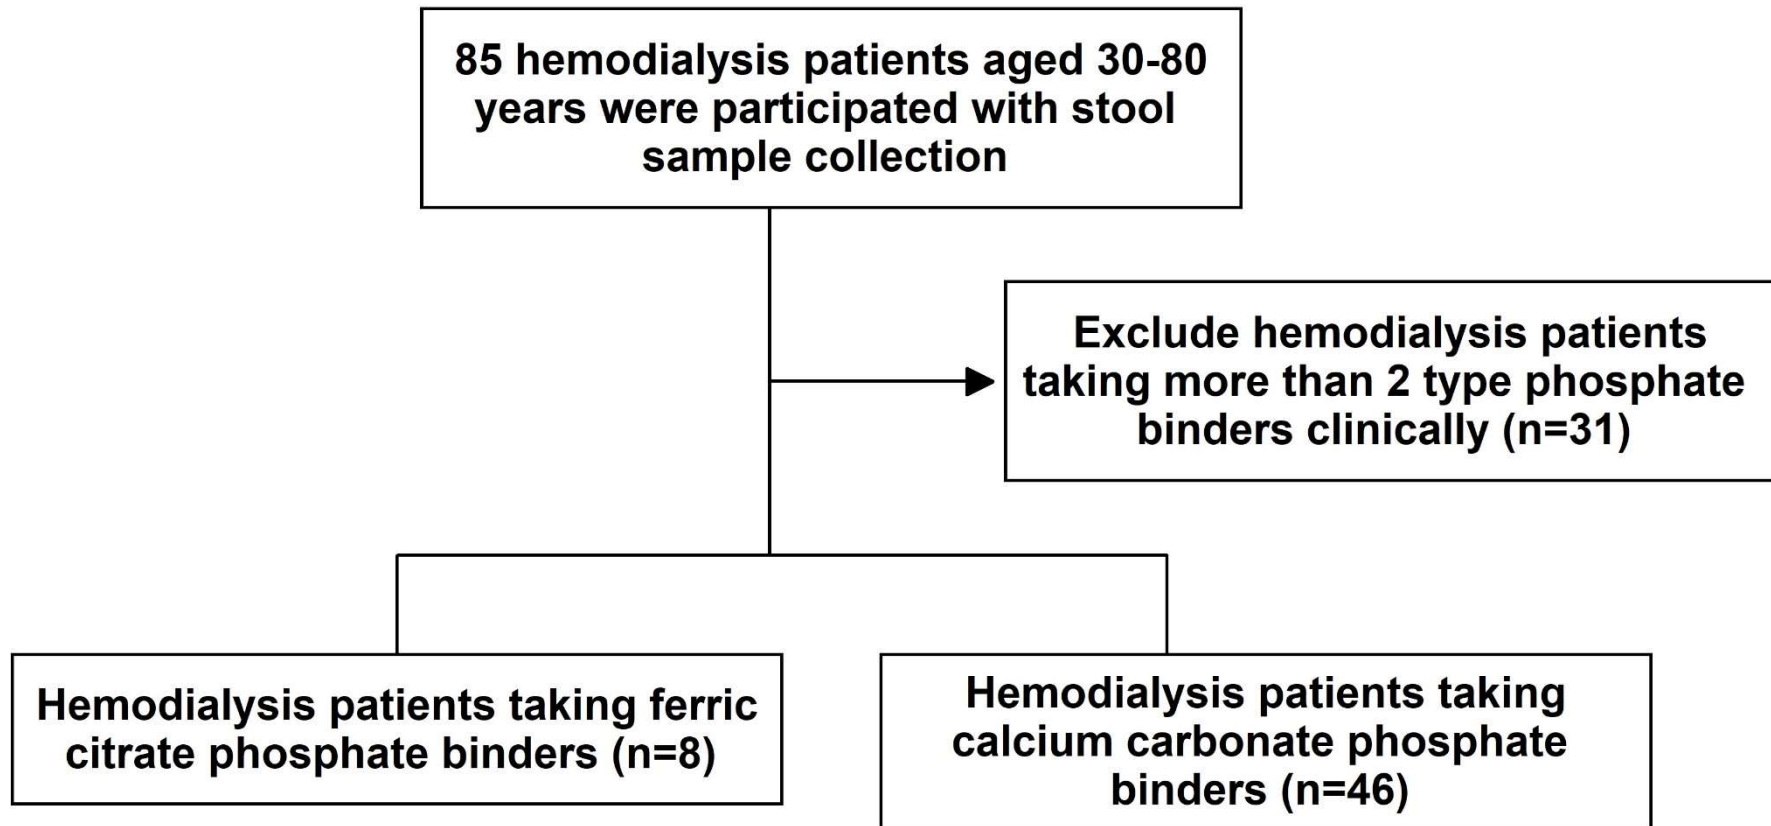

**Figure S2.** Rarefaction curves show the number of sequence reads and their corresponding number of OTUs

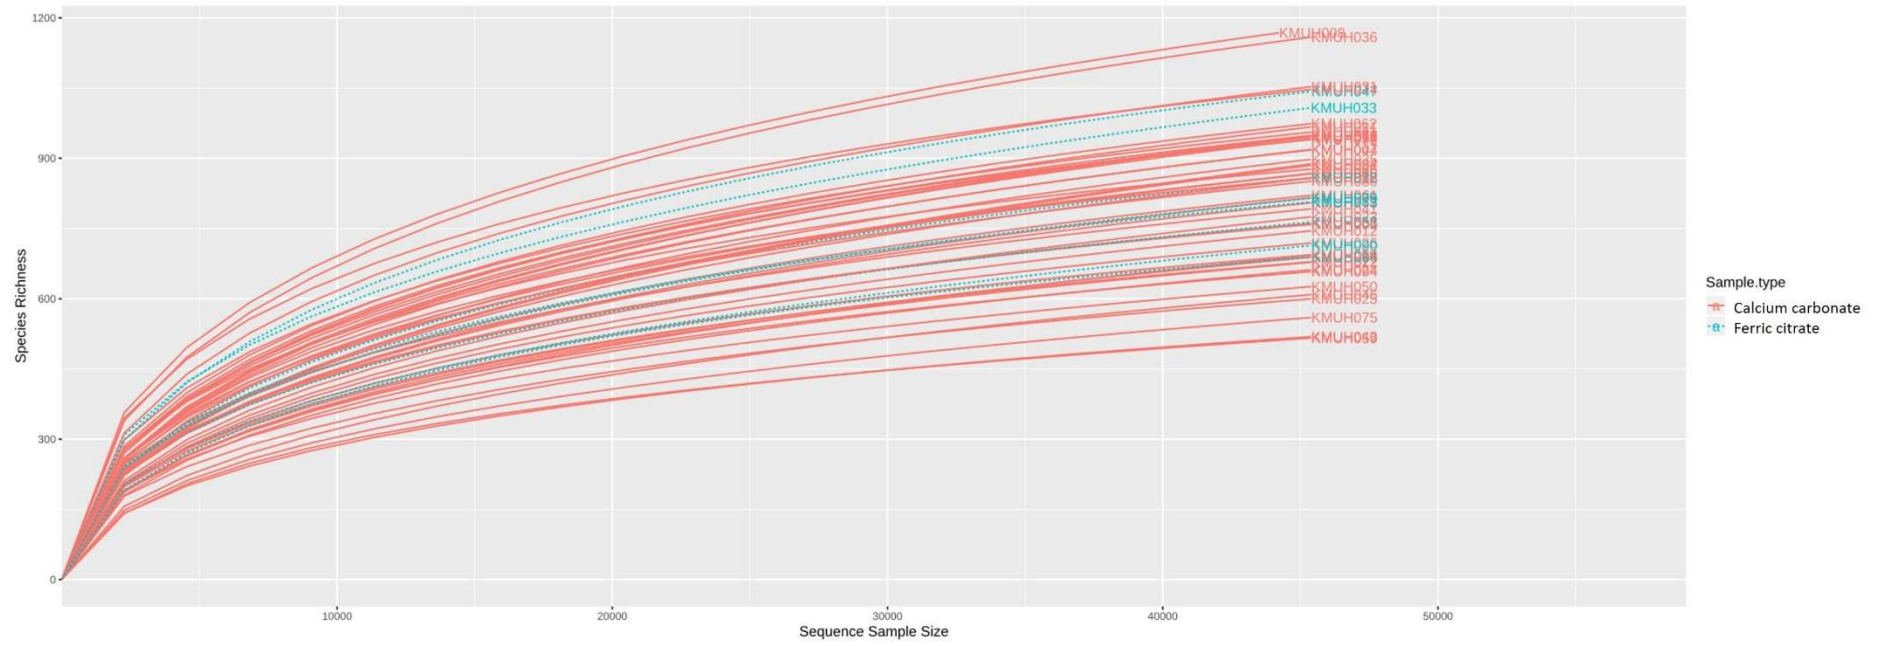

**Figure S3.** Core microbiota associated with ferric citrate phosphate binder used in hemodialysis patients. The name of the microbiome was summarized in Table S1.

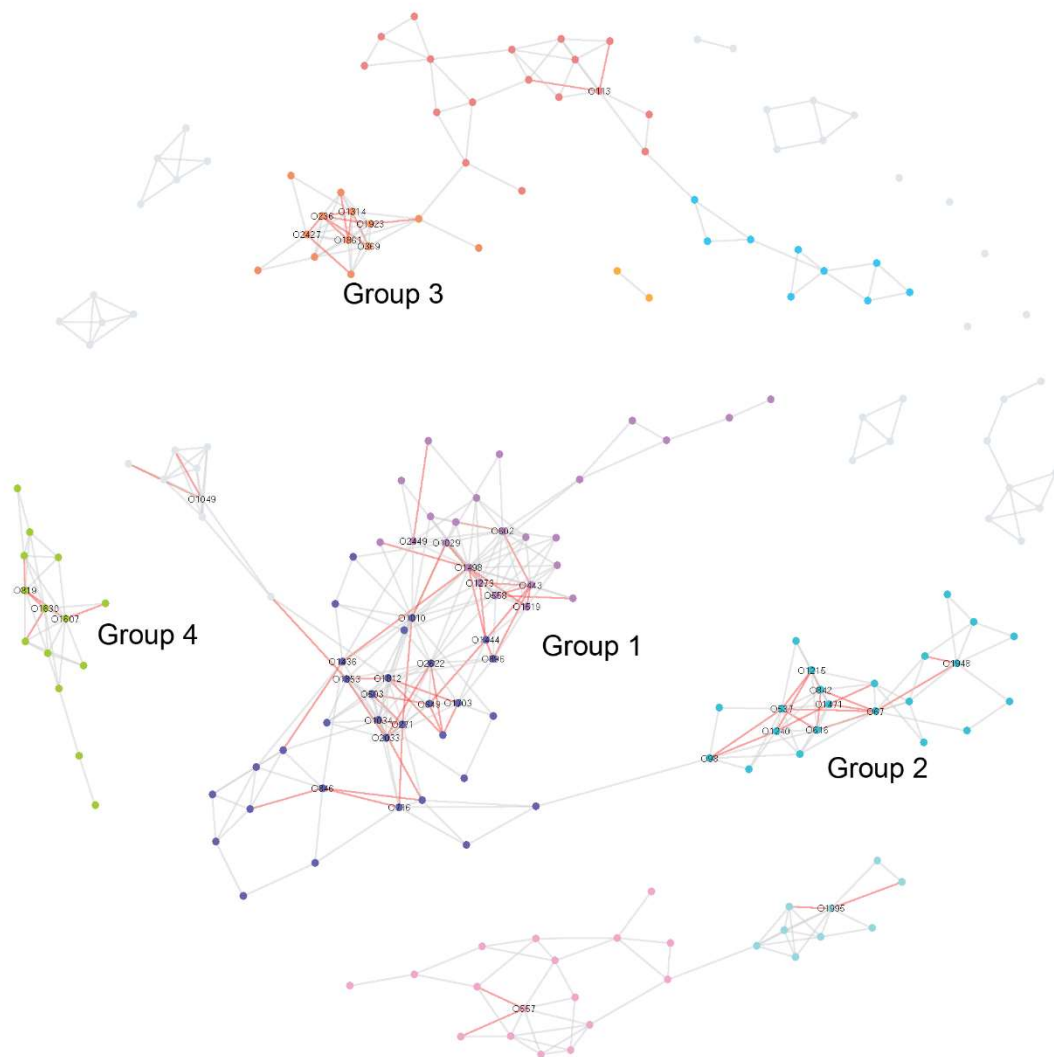



**Figure S5.** The relative abundance of the specific genus (A), family (B), and order (C) differentially enriched in the clinical settings after linear discriminant analysis

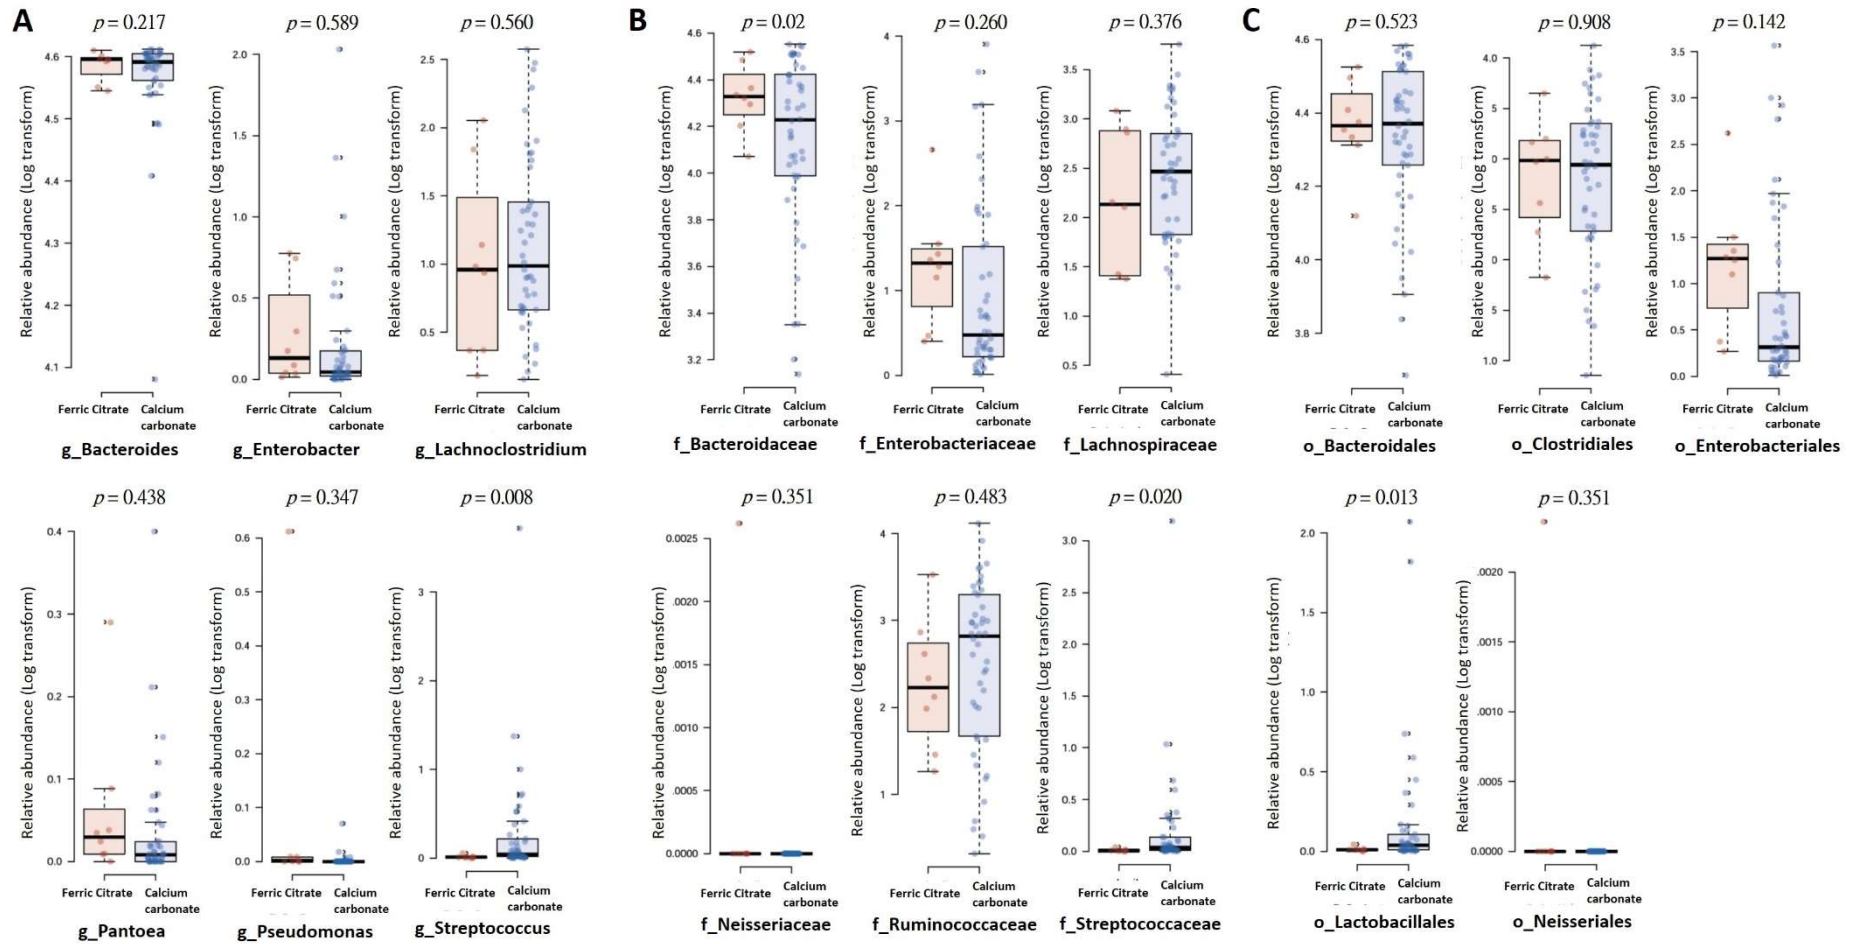

**Figure S6.** Functional classification of the predicted metagenome content of the microbiota of two different phosphate binders using KO modules. The relative abundances of modules were compared between hemodialysis patients with ferric citrate or calcium carbonate used. Significance was considered for  $p < 0.05$ .

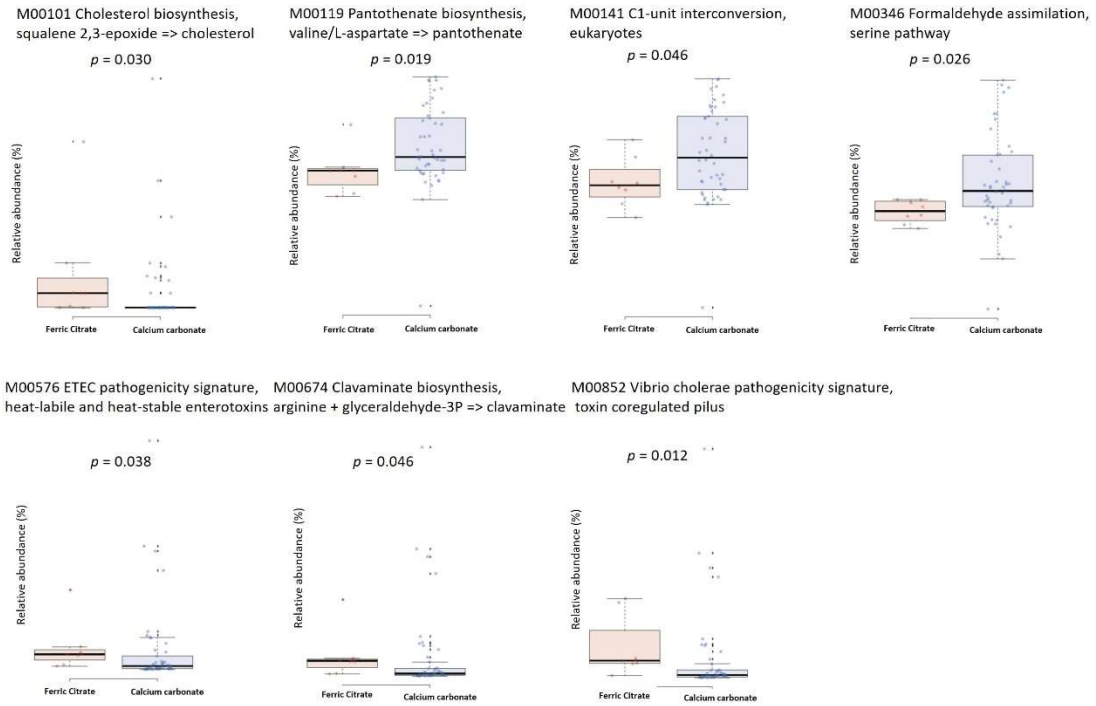

**Table S1.** Summary table of core microbiota associated with ferric citrate phosphate binder used in hemodialysis patients

| OUT ID  | Bacteria name                                                                                                           |
|---------|-------------------------------------------------------------------------------------------------------------------------|
| Group 1 |                                                                                                                         |
| O271    | p__Bacteroidetes.c__Bacteroidia.o__Bacteroidales.f__Bacteroidaceae.g__Bacteroides.s__uncultured Bacteroides sp.         |
| O443    | p__Bacteroidetes.c__Bacteroidia.o__Bacteroidales.f__Porphyromonadaceae.g__uncultured.s__uncultured bacterium            |
| O503    | p__Firmicutes.c__Clostridia.o__Clostridiales.f__Lachnospiraceae.g__Lachnospiraceae UCG-008.s__uncultured bacterium      |
| O558    | p__Bacteroidetes.c__Bacteroidia.o__Bacteroidales.f__Bacteroidaceae.g__Bacteroides.s__Bacteroides xylanisolvens          |
| O602    | p__Bacteroidetes.c__Bacteroidia.o__Bacteroidales.f__Bacteroidaceae.g__Bacteroides.s__uncultured bacterium               |
| O649    | p__Bacteroidetes.c__Bacteroidia.o__Bacteroidales.f__Bacteroidaceae.g__Bacteroides.s__uncultured bacterium               |
| O716    | p__Bacteroidetes.c__Bacteroidia.o__Bacteroidales.f__Bacteroidaceae.g__Bacteroides.s__uncultured bacterium               |
| O846    | p__Bacteroidetes.c__Bacteroidia.o__Bacteroidales.f__Bacteroidaceae.g__Bacteroides.s__uncultured bacterium               |
| O896    | p__Bacteroidetes.c__Bacteroidia.o__Bacteroidales.f__Bacteroidaceae.g__Bacteroides.s__uncultured organism                |
| O1010   | p__Bacteroidetes.c__Bacteroidia.o__Bacteroidales.f__Bacteroidaceae.g__Bacteroides.s__uncultured organism                |
| O1034   | p__Bacteroidetes.c__Bacteroidia.o__Bacteroidales.f__Bacteroidaceae.g__Bacteroides.s__uncultured organism                |
| O1029   | p__Bacteroidetes.c__Bacteroidia.o__Bacteroidales.f__Porphyromonadaceae.g__uncultured.s__uncultured bacterium            |
| O1273   | p__Bacteroidetes.c__Bacteroidia.o__Bacteroidales.f__Porphyromonadaceae.g__uncultured.s__uncultured bacterium            |
| O1436   | p__Bacteroidetes.c__Bacteroidia.o__Bacteroidales.f__Bacteroidaceae.g__Bacteroides.s__uncultured Bacteroides sp.         |
| O1444   | p__Bacteroidetes.c__Bacteroidia.o__Bacteroidales.f__Bacteroidaceae.g__Bacteroides.s__uncultured organism                |
| O1498   | p__Bacteroidetes.c__Bacteroidia.o__Bacteroidales.f__Bacteroidaceae.g__Bacteroides.s__uncultured bacterium               |
| O1519   | p__Bacteroidetes.c__Bacteroidia.o__Bacteroidales.f__Bacteroidaceae.g__Bacteroides.s__uncultured organism                |
| O1703   | p__Bacteroidetes.c__Bacteroidia.o__Bacteroidales.f__Bacteroidaceae.g__Bacteroides.s__uncultured bacterium               |
| O1812   | p__Bacteroidetes.c__Bacteroidia.o__Bacteroidales.f__Bacteroidaceae.g__Bacteroides.s__uncultured Bacteroidetes bacterium |

---

O1853 p\_\_Bacteroidetes.c\_\_Bacteroidia.o\_\_Bacteroidales.f\_\_Bacteroidaceae.g\_\_Bacteroides.s\_\_uncultured bacterium  
O2033 p\_\_Bacteroidetes.c\_\_Bacteroidia.o\_\_Bacteroidales.f\_\_Bacteroidaceae.g\_\_Bacteroides.s\_\_uncultured organism  
O2449 p\_\_Bacteroidetes.c\_\_Bacteroidia.o\_\_Bacteroidales.f\_\_Bacteroidaceae.g\_\_Bacteroides.s\_\_uncultured bacterium  
O2622 p\_\_Bacteroidetes.c\_\_Bacteroidia.o\_\_Bacteroidales.f\_\_Bacteroidaceae.g\_\_Bacteroides.s\_\_uncultured bacterium  
Group 2  
O67 p\_\_Bacteroidetes.c\_\_Bacteroidia.o\_\_Bacteroidales.f\_\_Bacteroidaceae.g\_\_Bacteroides.s\_\_uncultured Bacteroidetes bacterium  
O98 p\_\_Bacteroidetes.c\_\_Bacteroidia.o\_\_Bacteroidales.f\_\_Bacteroidaceae.g\_\_Bacteroides.s\_\_uncultured bacterium  
O537 p\_\_Bacteroidetes.c\_\_Bacteroidia.o\_\_Bacteroidales.f\_\_Bacteroidaceae.g\_\_Bacteroides.s\_\_uncultured bacterium  
O616 p\_\_Bacteroidetes.c\_\_Bacteroidia.o\_\_Bacteroidales.f\_\_Rikenellaceae.g\_\_Alistipes.s\_\_uncultured bacterium  
O842 p\_\_Bacteroidetes.c\_\_Bacteroidia.o\_\_Bacteroidales.f\_\_Bacteroidaceae.g\_\_Bacteroides.s\_\_uncultured bacterium  
O1215 p\_\_Bacteroidetes.c\_\_Bacteroidia.o\_\_Bacteroidales.f\_\_Bacteroidaceae.g\_\_Bacteroides.s\_\_uncultured bacterium  
O1240 p\_\_Firmicutes.c\_\_Clostridia.o\_\_Clostridiales.f\_\_Lachnospiraceae.g\_\_Lachnospiraceae UCG-004.s\_\_uncultured bacterium  
O1471 p\_\_Bacteroidetes.c\_\_Bacteroidia.o\_\_Bacteroidales.f\_\_Bacteroidaceae.g\_\_Bacteroides.s\_\_uncultured organism  
O1948 p\_\_Firmicutes.c\_\_Clostridia.o\_\_Clostridiales.f\_\_Ruminococcaceae.g\_\_Ruminococcus 1.s\_\_Ruminococcus sp. NML 00-0124  
Group 3  
O236 p\_\_Bacteroidetes.c\_\_Bacteroidia.o\_\_Bacteroidales.f\_\_Bacteroidaceae.g\_\_Bacteroides.s\_\_uncultured organism  
O369 p\_\_Bacteroidetes.c\_\_Bacteroidia.o\_\_Bacteroidales.f\_\_Bacteroidaceae.g\_\_Bacteroides.s\_\_uncultured bacterium  
O1314 p\_\_Bacteroidetes.c\_\_Bacteroidia.o\_\_Bacteroidales.f\_\_Bacteroidaceae.g\_\_Bacteroides.s\_\_uncultured organism  
O1861 p\_\_Bacteroidetes.c\_\_Bacteroidia.o\_\_Bacteroidales.f\_\_Bacteroidaceae.g\_\_Bacteroides.s\_\_uncultured bacterium  
O1923 p\_\_Bacteroidetes.c\_\_Bacteroidia.o\_\_Bacteroidales.f\_\_Bacteroidaceae.g\_\_Bacteroides.s\_\_uncultured bacterium  
O2427 p\_\_Bacteroidetes.c\_\_Bacteroidia.o\_\_Bacteroidales.f\_\_Bacteroidaceae.g\_\_Bacteroides.s\_\_uncultured organism  
Group 4

---



---

O819 p\_\_Firmicutes.c\_\_Clostridia.o\_\_Clostridiales.f\_\_Lachnospiraceae.g\_\_Lachnospiraceae UCG-004.s\_\_uncultured bacterium

O1607 p\_\_Bacteroidetes.c\_\_Bacteroidia.o\_\_Bacteroidales.f\_\_Bacteroidaceae.g\_\_Bacteroides.s\_\_uncultured bacterium

O1630 p\_\_Bacteroidetes.c\_\_Bacteroidia.o\_\_Bacteroidales.f\_\_Bacteroidaceae.g\_\_Bacteroides.s\_\_uncultured organism

---

**Table S2.** Summary table of core microbiota associated with calcium carbonate used in hemodialysis patients

| OUT ID  | Bacteria name                                                                                                   |
|---------|-----------------------------------------------------------------------------------------------------------------|
| Group 1 |                                                                                                                 |
| O3      | p__Bacteroidetes.c__Bacteroidia.o__Bacteroidales.f__Prevotellaceae.g__Prevotella 9.s__uncultured bacterium      |
| O269    | p__Bacteroidetes.c__Bacteroidia.o__Bacteroidales.f__Prevotellaceae.g__Prevotella 9.s__uncultured bacterium      |
| O406    | p__Bacteroidetes.c__Bacteroidia.o__Bacteroidales.f__Prevotellaceae.g__Prevotella 9.s__uncultured bacterium      |
| O480    | p__Bacteroidetes.c__Bacteroidia.o__Bacteroidales.f__Prevotellaceae.g__Prevotella 9.s__uncultured organism       |
| O530    | p__Bacteroidetes.c__Bacteroidia.o__Bacteroidales.f__Prevotellaceae.g__Prevotella 9.s__uncultured organism       |
| O599    | p__Bacteroidetes.c__Bacteroidia.o__Bacteroidales.f__Prevotellaceae.g__Prevotella 9.s__uncultured bacterium      |
| O751    | p__Bacteroidetes.c__Bacteroidia.o__Bacteroidales.f__Prevotellaceae.g__Prevotella 9.s__uncultured bacterium      |
| O760    | p__Bacteroidetes.c__Bacteroidia.o__Bacteroidales.f__Prevotellaceae.g__Prevotella 9.s__uncultured bacterium      |
| O1171   | p__Bacteroidetes.c__Bacteroidia.o__Bacteroidales.f__Bacteroidaceae.g__Bacteroides.s__uncultured bacterium       |
| O1279   | p__Bacteroidetes.c__Bacteroidia.o__Bacteroidales.f__Prevotellaceae.g__Prevotella 9.s__uncultured bacterium      |
| O1546   | p__Bacteroidetes.c__Bacteroidia.o__Bacteroidales.f__Prevotellaceae.g__Prevotella 9.s__uncultured bacterium      |
| O1666   | p__Bacteroidetes.c__Bacteroidia.o__Bacteroidales.f__Prevotellaceae.g__Prevotella 9.s__uncultured bacterium      |
| O1667   | p__Bacteroidetes.c__Bacteroidia.o__Bacteroidales.f__Prevotellaceae.g__Prevotella 9.s__uncultured bacterium      |
| O1990   | p__Bacteroidetes.c__Bacteroidia.o__Bacteroidales.f__Prevotellaceae.g__Prevotella 9.s__uncultured bacterium CA75 |
| O1995   | p__Bacteroidetes.c__Bacteroidia.o__Bacteroidales.f__Prevotellaceae.g__Prevotella 9.s__uncultured organism       |
| O2234   | p__Bacteroidetes.c__Bacteroidia.o__Bacteroidales.f__Prevotellaceae.g__Prevotella 9.s__uncultured bacterium      |
| O2254   | p__Bacteroidetes.c__Bacteroidia.o__Bacteroidales.f__Prevotellaceae.g__Prevotella 9.s__uncultured bacterium      |
| O2439   | p__Bacteroidetes.c__Bacteroidia.o__Bacteroidales.f__Prevotellaceae.g__Prevotella 9.s__uncultured bacterium      |
| O2553   | p__Bacteroidetes.c__Bacteroidia.o__Bacteroidales.f__Prevotellaceae.g__Prevotella 9.s__uncultured bacterium      |

---

O2633 p\_\_Bacteroidetes.c\_\_Bacteroidia.o\_\_Bacteroidales.f\_\_Prevotellaceae.g\_\_Prevotella 9.s\_\_uncultured bacterium  
Group 2  
O67 p\_\_Bacteroidetes.c\_\_Bacteroidia.o\_\_Bacteroidales.f\_\_Bacteroidaceae.g\_\_Bacteroides.s\_\_uncultured Bacteroidetes bacterium  
O98 p\_\_Bacteroidetes.c\_\_Bacteroidia.o\_\_Bacteroidales.f\_\_Bacteroidaceae.g\_\_Bacteroides.s\_\_uncultured bacterium  
O537 p\_\_Bacteroidetes.c\_\_Bacteroidia.o\_\_Bacteroidales.f\_\_Bacteroidaceae.g\_\_Bacteroides.s\_\_uncultured bacterium  
O842 p\_\_Bacteroidetes.c\_\_Bacteroidia.o\_\_Bacteroidales.f\_\_Bacteroidaceae.g\_\_Bacteroides.s\_\_uncultured bacterium  
O1240 p\_\_Firmicutes.c\_\_Clostridia.o\_\_Clostridiales.f\_\_Lachnospiraceae.g\_\_Lachnospiraceae UCG-004.s\_\_uncultured bacterium  
O1454 p\_\_Bacteroidetes.c\_\_Bacteroidia.o\_\_Bacteroidales.f\_\_Bacteroidaceae.g\_\_Bacteroides.s\_\_uncultured bacterium  
O1785 p\_\_Bacteroidetes.c\_\_Bacteroidia.o\_\_Bacteroidales.f\_\_Bacteroidaceae.g\_\_Bacteroides.s\_\_uncultured bacterium  
O2076 p\_\_Bacteroidetes.c\_\_Bacteroidia.o\_\_Bacteroidales.f\_\_Bacteroidaceae.g\_\_Bacteroides.s\_\_uncultured organism  
O2154 p\_\_Firmicutes.c\_\_Clostridia.o\_\_Clostridiales.f\_\_Lachnospiraceae.g\_\_Lachnospiraceae UCG-004.s\_\_uncultured bacterium  
Group 3  
O602 p\_\_Bacteroidetes.c\_\_Bacteroidia.o\_\_Bacteroidales.f\_\_Bacteroidaceae.g\_\_Bacteroides.s\_\_uncultured bacterium  
O1010 p\_\_Bacteroidetes.c\_\_Bacteroidia.o\_\_Bacteroidales.f\_\_Bacteroidaceae.g\_\_Bacteroides.s\_\_uncultured organism  
O1034 p\_\_Bacteroidetes.c\_\_Bacteroidia.o\_\_Bacteroidales.f\_\_Bacteroidaceae.g\_\_Bacteroides.s\_\_uncultured organism  
O1128 p\_\_Bacteroidetes.c\_\_Bacteroidia.o\_\_Bacteroidales.f\_\_Bacteroidaceae.g\_\_Bacteroides.s\_\_uncultured organism  
O1436 p\_\_Bacteroidetes.c\_\_Bacteroidia.o\_\_Bacteroidales.f\_\_Bacteroidaceae.g\_\_Bacteroides.s\_\_uncultured Bacteroides sp.  
O1444 p\_\_Bacteroidetes.c\_\_Bacteroidia.o\_\_Bacteroidales.f\_\_Bacteroidaceae.g\_\_Bacteroides.s\_\_uncultured organism  
O1498 p\_\_Bacteroidetes.c\_\_Bacteroidia.o\_\_Bacteroidales.f\_\_Bacteroidaceae.g\_\_Bacteroides.s\_\_uncultured bacterium  
O1812 p\_\_Bacteroidetes.c\_\_Bacteroidia.o\_\_Bacteroidales.f\_\_Bacteroidaceae.g\_\_Bacteroides.s\_\_uncultured Bacteroidetes bacterium  
O2449 p\_\_Bacteroidetes.c\_\_Bacteroidia.o\_\_Bacteroidales.f\_\_Bacteroidaceae.g\_\_Bacteroides.s\_\_uncultured bacterium  
Group 4

---

---

O366 p\_\_Bacteroidetes.c\_\_Bacteroidia.o\_\_Bacteroidales.f\_\_Bacteroidaceae.g\_\_Bacteroides.s\_\_uncultured bacterium  
O369 p\_\_Bacteroidetes.c\_\_Bacteroidia.o\_\_Bacteroidales.f\_\_Bacteroidaceae.g\_\_Bacteroides.s\_\_uncultured bacterium  
O867 p\_\_Bacteroidetes.c\_\_Bacteroidia.o\_\_Bacteroidales.f\_\_Bacteroidaceae.g\_\_Bacteroides.s\_\_uncultured organism  
O1292 p\_\_Bacteroidetes.c\_\_Bacteroidia.o\_\_Bacteroidales.f\_\_Bacteroidaceae.g\_\_Bacteroides.s\_\_uncultured bacterium  
O1314 p\_\_Bacteroidetes.c\_\_Bacteroidia.o\_\_Bacteroidales.f\_\_Bacteroidaceae.g\_\_Bacteroides.s\_\_uncultured organism  
O1861 p\_\_Bacteroidetes.c\_\_Bacteroidia.o\_\_Bacteroidales.f\_\_Bacteroidaceae.g\_\_Bacteroides.s\_\_uncultured bacterium  
O1923 p\_\_Bacteroidetes.c\_\_Bacteroidia.o\_\_Bacteroidales.f\_\_Bacteroidaceae.g\_\_Bacteroides.s\_\_uncultured bacterium  
Group 5  
O819 p\_\_Firmicutes.c\_\_Clostridia.o\_\_Clostridiales.f\_\_Lachnospiraceae.g\_\_Lachnospiraceae UCG-004.s\_\_uncultured bacterium  
O1055 p\_\_Bacteroidetes.c\_\_Bacteroidia.o\_\_Bacteroidales.f\_\_Bacteroidaceae.g\_\_Bacteroides.s\_\_uncultured bacterium  
O1607 p\_\_Bacteroidetes.c\_\_Bacteroidia.o\_\_Bacteroidales.f\_\_Bacteroidaceae.g\_\_Bacteroides.s\_\_uncultured bacterium  
O1630 p\_\_Bacteroidetes.c\_\_Bacteroidia.o\_\_Bacteroidales.f\_\_Bacteroidaceae.g\_\_Bacteroides.s\_\_uncultured organism  
O2120 p\_\_Bacteroidetes.c\_\_Bacteroidia.o\_\_Bacteroidales.f\_\_Bacteroidaceae.g\_\_Bacteroides.s\_\_uncultured bacterium  
O2138 p\_\_Bacteroidetes.c\_\_Bacteroidia.o\_\_Bacteroidales.f\_\_Bacteroidaceae.g\_\_Bacteroides.s\_\_uncultured bacterium

---
